# Supplementary material for: Signaling through FcγRIIA and the C5a-C5aR pathway mediates platelet hyperactivation in COVID-19
Source: bioRxiv or medRxiv preprint supplement (doi:10.1101/2021.05.01.442279), 2021-05-03
Supplement: Supplementary file [file media-1.pdf]

Supplementary materials:

Supplementary Figure 1.

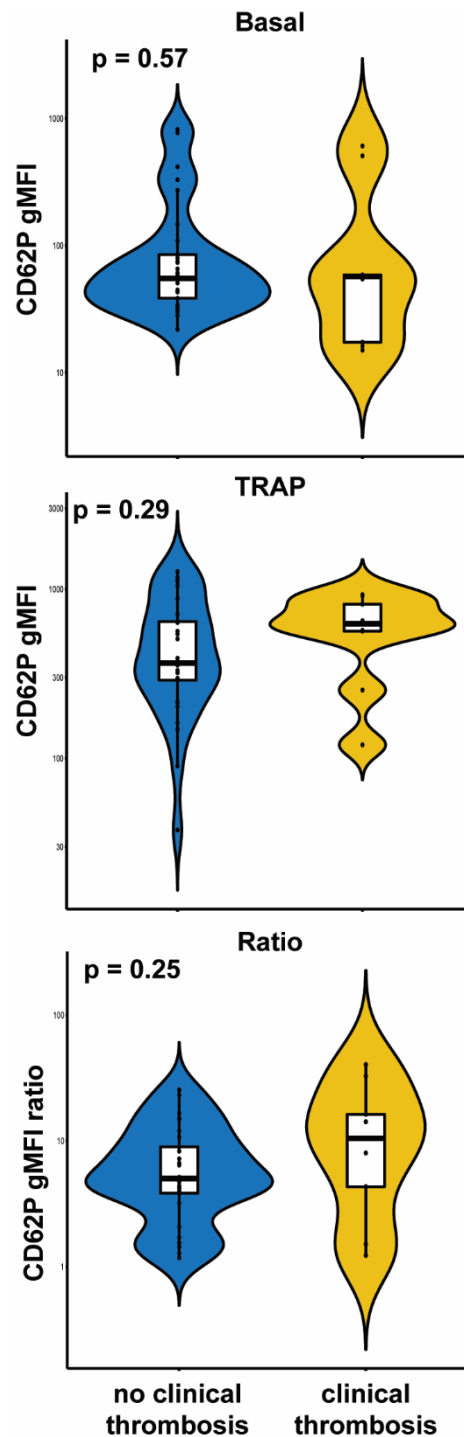

**Supplementary Figure 1.** Cumulative data for CD62P surface expression of *ex vivo* isolated platelets at baseline (basal), after TRAP activation (TRAP) and their ratio for hospitalized COVID-19 patients that experienced a clinical thrombosis or not. Mann-Whitney non-parametric testing was used and the *p*-values are depicted.

Supplementary Figure 2.

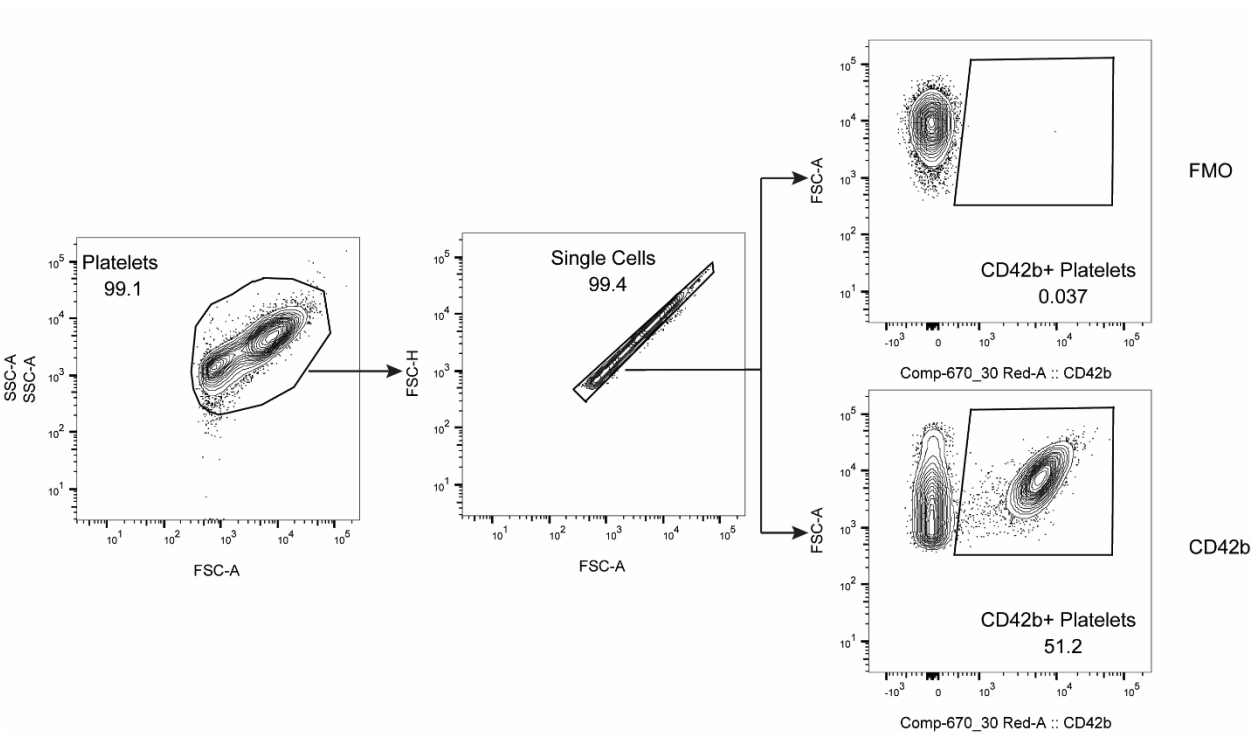

Supplementary Figure 2. Gating strategy for isolated control platelets incubated with COVID-19 plasma.

**Supplementary Figure 3.**

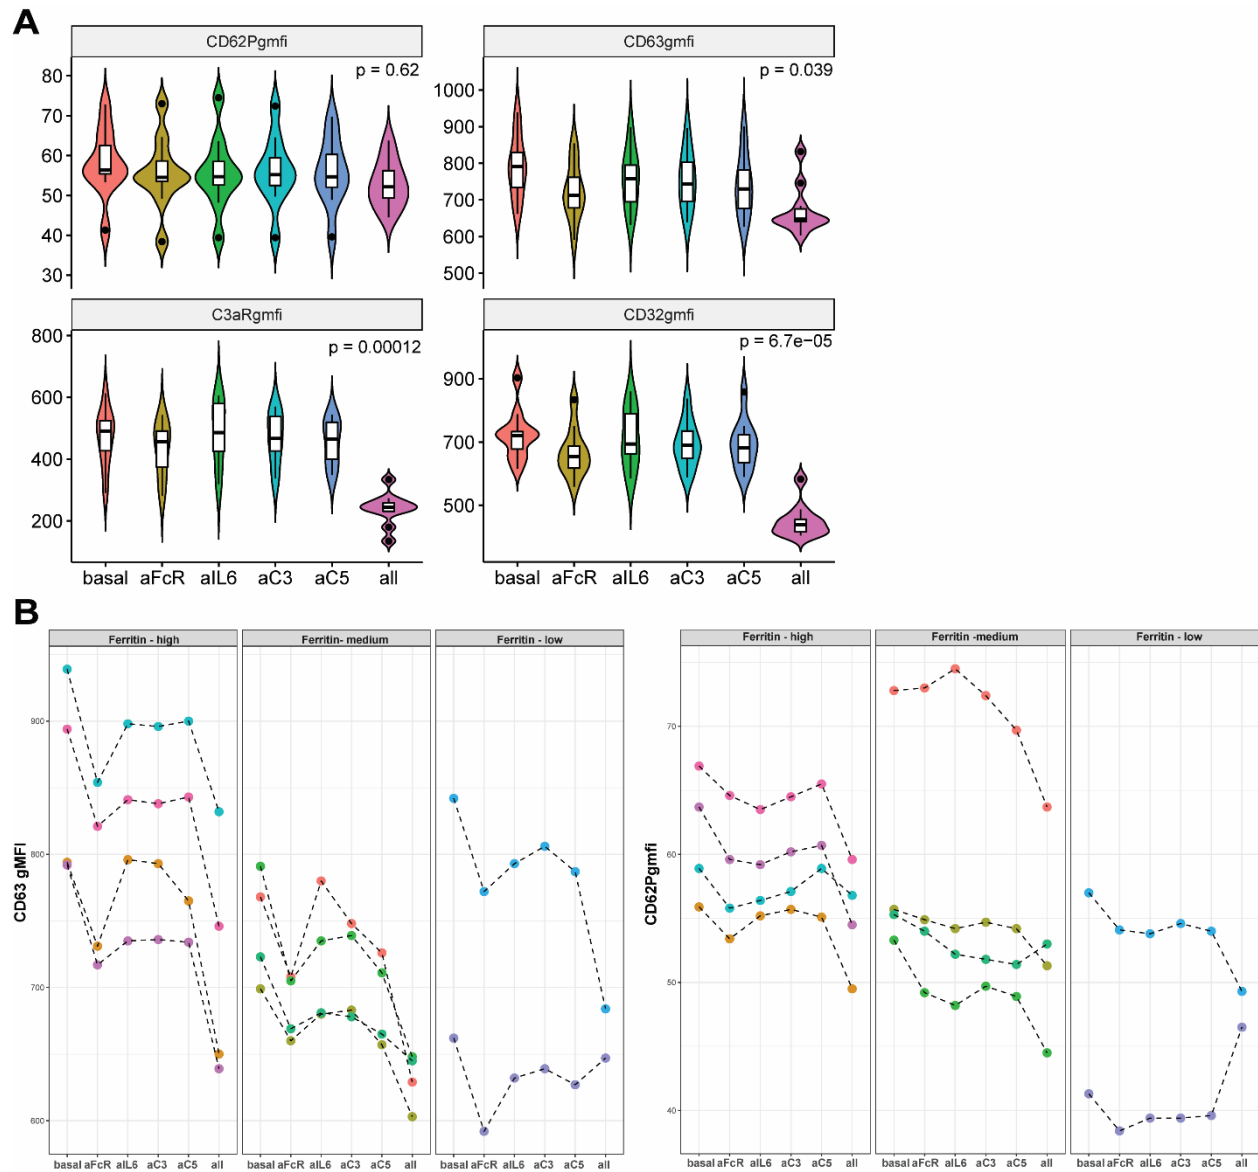

**Supplementary Figure 3. A)** Violin plots of gMFI expression of CD62P, CD63, CD32 and C3aR on the surface of control platelets incubated with COVID-19 plasma (n=10 patients) in the presence or absence of neutralizing antibodies to FcγRIIa, IL6, C3a and C5a, as indicated. Kruskal-Wallis non-parametric testing was used to compare the groups and the *p*-values are depicted. **B)** Same samples and conditions depicted in (A) but categorized based on the corresponding patient's ferritin levels. Ferritin – low: <1000ng/mL; Ferritin – medium: 1000-2000ng/mL; Ferritin – high >2000ng/mL

**Supplementary Figure 4.**

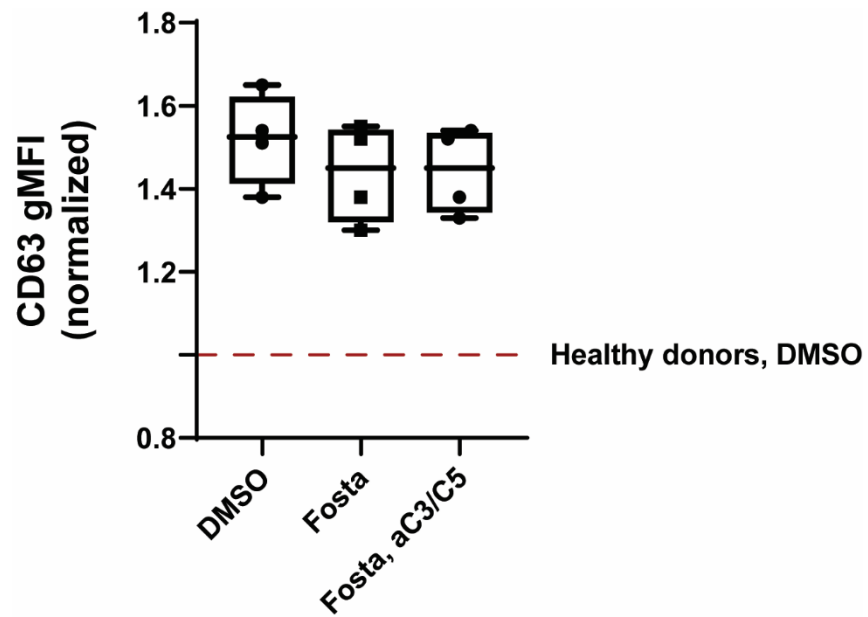

**Supplementary Figure 4.** Boxplots of gMFI expression of CD63 on the surface of control platelets incubated with COVID-19 plasma (n=4 patients) in the absence or presence of fostamatinib or fostamatinib and neutralizing antibodies to C3a and C5a.

**Supplementary Table 1.**

|                                                      | COVID-19 patients with platelets<br>assayed <i>ex vivo</i><br>(33 unique patients, 38 samples) | COVID-19 patients with plasma<br>assayed <i>in vitro</i><br>(47 unique patients, 64 samples) |
|------------------------------------------------------|------------------------------------------------------------------------------------------------|----------------------------------------------------------------------------------------------|
| Age (mean, SEM)                                      | 60.2 (2.94)                                                                                    | 58.7 (2.14)                                                                                  |
| Gender (male, %)                                     | 48%                                                                                            | 62%                                                                                          |
| BMI (mean, SEM)                                      | 34 (2.2)                                                                                       | 32.7 (1.67)                                                                                  |
| Platelet count (mean, SEM)                           | 261.9 (17.8)                                                                                   | 246 (12.6)                                                                                   |
| WBC count (mean, SEM)                                | 7.9 (0.6)                                                                                      | 9.3 (1.0)                                                                                    |
| D-dimer (mean, SEM)                                  | 4.37 (1.64)                                                                                    | 7.04 (2.8)                                                                                   |
| Ferritin (mean, SEM)                                 | 1350.3 (363)                                                                                   | 1650.1 (313.8)                                                                               |
| LDH (mean, SEM)                                      | 347.2 (22.9)                                                                                   | 404.5 (33.25)                                                                                |
| Hs-CRP (mean, SEM)                                   | 91.8 (10.9)                                                                                    | 81.53 (12.57)                                                                                |
| CVD risk (%)                                         | 82%                                                                                            | 87%                                                                                          |
| APACHEIII (mean, SEM)                                | 61.6 (3.9)                                                                                     | 63.58 (4.27)                                                                                 |
| Enrollment NIH Disease Severity<br>Score (mean, SEM) | 3.4 (0.18)                                                                                     | 3.28 (0.15)                                                                                  |
| Incident thrombosis (%)                              | 9%                                                                                             | 34%                                                                                          |
| SARS-CoV-2 IgM (ug/mL, mean, SEM)                    | 10.47 (3.73)                                                                                   | 10.53 (4.48)                                                                                 |
| SARS-CoV-2 IgG (ug/mL, mean, SEM)                    | 41.1 (8.76)                                                                                    | 47.9 (10.65)                                                                                 |

**Supplementary Table 1.** Clinical information of the COVID-19 patients evaluated.

**Supplementary Table 2.**

|                  | Condition | Fold-change<br>(mean $\pm$ SEM) | P value vs.<br>No drug |
|------------------|-----------|---------------------------------|------------------------|
| <b>Immediate</b> | ---       | 55.85 $\pm$ 29.63               |                        |
|                  | R406      | 2.61 $\pm$ 0.92                 | 0.0255                 |
|                  | Anti-FcR  | 0.96 $\pm$ 0.34                 | 0.0245                 |
|                  | Anti-C5a  | 1.35 $\pm$ 0.50                 | 0.0275                 |
| <b>5 mins</b>    | ---       | 406.65 $\pm$ 363.08             |                        |
|                  | R406      | 5.613 $\pm$ 2.68                | 0.0255                 |
|                  | Anti-FcR  | 3.08 $\pm$ 2.36                 | 0.0245                 |
|                  | Anti-C5a  | 9.79 $\pm$ 9.14                 | 0.0275                 |
| <b>10 mins</b>   | ---       | 762.60 $\pm$ 719.81             |                        |
|                  | R406      | 6.68 $\pm$ 3.373                | 0.0255                 |
|                  | Anti-FcR  | 4.13 $\pm$ 3.34                 | 0.0245                 |
|                  | Anti-C5a  | 17.52 $\pm$ 16.98               | 0.0275                 |
| <b>15 mins</b>   | ---       | 415.88 $\pm$ 371.80             |                        |
|                  | R406      | 5.86 $\pm$ 2.92                 | 0.0255                 |
|                  | Anti-FcR  | 3.75 $\pm$ 1.88                 | 0.0245                 |
|                  | Anti-C5a  | 9.13 $\pm$ 8.54                 | 0.0275                 |

**Supplementary Table 2.** Inhibition of platelet aggregation in hematoporphyrin-induced photochemical injury model in an endothelial-lined microfluidic channel. Analysis of relative fluorescence intensity of platelet aggregation in the hematoporphyrin-induced photochemical injured endothelial-lined microfluidic channel at different times after infusion of platelets in plasma (n=7) from a severe COVID-19 patient: immediate, 5 min, 10 min and 15 min. Data is expressed as fold increase of platelet accumulation with patient plasma over healthy donor plasma. P values were calculated using Dunnett's multiple comparisons test, n=7.
